# Supplementary material
Source: HighWire-hosted journal article supplement (https://bmjopen.bmj.com/content/14/11/e088201)
Supplement: inline-supplementary-material-4 [file inline-supplementary-material-4.pdf]

Supplemental file 4. Table 2. An overview of patient discourses on real-time access to test results.

|                                                                                          | Discourse 1: <i>Real-time access as a source of stress</i>                                                                         | Discourse 2: <i>Anxiety reduction through real-time access</i>                                                                                             | Discourse 3: <i>Real-time access for self-management</i>                                                                                          |
|------------------------------------------------------------------------------------------|------------------------------------------------------------------------------------------------------------------------------------|------------------------------------------------------------------------------------------------------------------------------------------------------------|---------------------------------------------------------------------------------------------------------------------------------------------------|
| Key words                                                                                | Stress, complexity, and ambivalence.                                                                                               | Stressful waiting period, preparation, and relief.                                                                                                         | Facilitator of self-management, frequent checking.                                                                                                |
| Implications of complex language use                                                     | Ambivalence about whether to look at test results and risk of misunderstanding and stress due to searching on the internet.        | Willingness to ask healthcare professionals or relatives with medical knowledge for explanation or search for an explanation on the internet.              | Learning process: patients can and will learn where to look and what to search for on the internet.                                               |
| What is the value of real-time access to test results?                                   | The value of transparency.<br><br>The value of being well-informed as a patient before or after a medical consultation.            | The value of transparency.<br><br>The value of being well-informed as a patient.<br><br>The value of emotional relief.                                     | The value of transparency.<br><br>The value of being empowered as a patient.                                                                      |
| How to provide patient-centered real-time access to test results on a portal? (practical | Reducing stress by providing information about the advantages and disadvantages of real-time access, also on the patient portal by | Reducing anxiety by providing reference values for test results on the portal, health-related information in layman’s terms as well as open notes from the | Improving self-management opportunities by providing a check mark on the portal that indicates whether the doctor has looked at the test results, |

|                      |                                                                                                        |                                                                                                                                     |                                                                                                                                              |
|----------------------|--------------------------------------------------------------------------------------------------------|-------------------------------------------------------------------------------------------------------------------------------------|----------------------------------------------------------------------------------------------------------------------------------------------|
| <b>consequences)</b> | texts or videos, and offering patients a conversation with a healthcare professional (pre-counseling). | healthcare professionals and providing comprehensible explanations on interpretation of test results from healthcare professionals. | more transparency on health-related information in the medical file, and the possibility for patients to correct inaccuracies in their file. |
|----------------------|--------------------------------------------------------------------------------------------------------|-------------------------------------------------------------------------------------------------------------------------------------|----------------------------------------------------------------------------------------------------------------------------------------------|
